# Supplementary material for: Adeno-Associated Virus (AAV) Gene Delivery: Dissecting Molecular Interactions upon Cell Entry
Source: MDPI journal article supplement (doi:10.3390/v13071336), 2021-07-10
Supplement: s1 [file viruses-1266593-supplementary.xlsx]

## Sheet: Supp Table 1
Variable region	AAV2 (VP1)	Mutant	Transduction of AAV2 into HepG2 (liver) (Lochrie et al., 2006)	Transduction: (a) AAV1, AAV5 into HEK293T (kidney) (Zhang et al., 2019); (b) AAV2 into HEK293T (kidney) (Zhang et al., 2019); (c) AAV2 into HeLa C12 (uterus) (Opie et al., 2003)	References. a: Zhang et al., 2019 (Nature Microbiology); b: Zhang et al., 2019 (Nature Communications); c: Opie et al., 2003 (J Virol)	mouse liver	mouse kidney	mouse spleen	mouse heart	mouse lungs		Variable region	AAV2 (VP1)	Mutant (all for AAV2 serotype, unless otherwise indicated with a preceeding serotype number)	Transduction of AAV2 into HepG2 (liver) (Lochrie et al., 2006)	Transduction: (a) AAV1, AAV5 into HEK293T (kidney) (Zhang et al., 2019); (b) AAV2 into HEK293T (kidney) (Zhang et al., 2019); (c) AAV2 into HeLa C12 (uterus) (Opie et al., 2003)	mouse liver (ND = not detected)	mouse kidney	mouse spleen	mouse heart	mouse lungs
I	Q263	Q263A	-	o	b	o	o	o	o	+		I	Q263	Q263A	-		o	o	o	o	+
														1: A263G		o (b)
	S264	S264A	o			o	o	o	o	o			S264	S264A	o		o	o	o	o	o
	G265	G265A	--			--	o	o	o	o			G265	G265A	--		--	o	o	o	o
		G265D	--			o	o	o	o	o				G265D	--		o	o	o	o	o
	A266	A266S		--	a	-	o	o	o	o			A266	A266S		-- (a)	-	o	o	o	o
	S267	S267A	+	o	b	o	o	o	o	o			S267	S267A	+		o	o	o	o	o
														1: S268A		o (b)
		S267T	++			o	o	o	o	o				S267T	++		o	o	o	o	o
	N268	N268A	--	--	b	o	o	o	o	o			N268	N268A	--		o	o	o	o	o
														1: N269A		-- (b)
		N268Q	--			--	o	o	o	o				N268Q	--		--	o	o	o	o
	D269	D269A	--			+	o	o	o	+			D269	D269A	--		+	o	o	o	+
		D269E	--			--	o	o	o	+				D269E	--		--	o	o	o	+
		D269N	--			o	o	o	o	-				D269N	--		o	o	o	o	-
	N270	N270A	o			o	o	o	o	o			N270	N270A	o		o	o	o	o	o
	H271	H271A	--	o	b	o	o	o	o	o			H271	H271A	--		o	o	o	o	o
														1: H272A		o (b)
		H271F	--			o	o	o	o	o				H271F	--		o	o	o	o	o
		H271Q	--			-	o	o	o	o				H271Q	--		-	o	o	o	o
		H271T	--			--	o	o	o	o				H271T	--		--	o	o	o	o
	Q325	Q325A	--			o	o	o	o	o			Q325	Q325A	--		o	o	o	o	o
II	D327	D327A	-			o	o	o	o	o		II	D327	D327A	-		o	o	o	o	o
	G328	G328S	--	o	b	o	o	o	o	o			G328	G328S	--		o	o	o	o	o
														5: S319A		o (b)
	T330	T330A	--			o	o	o	o	+			T330	T330A	--		o	o	o	o	+
III	N382A	N382A	--	o	b	--	o	o	-	-		III	N382	N382A	--	o (b)	--	o	o	-	-
	G383A	G383A	--			o	o	o	o	o			G383	G383A	--		o	o	o	o	o
	S384A	S384A		o	b								S384	S384A	-	-- (a)	o	o	o	o	o
			-	--	a	o	o	o	o	o				1: S385A		o (b)
													Q385	Q385A	-		o	o	o	o	o
	Q385A	Q385A	-	o	b	o	o	o	o	o				1: Q386A		o (b)
	R447	R447A		o	c	o	o	o	o	o			R447	R447A		o (c)	o	o	o	o	o
IV	T450?			o	b							IV	T450?	5: N443A		o (b)
	S452	S452A	o			o	o	o	o	o			S452	S452A	o		o	o	o	o	o
	T454	T454A	o			o	o	o	o	o			T454	T454A	o		o	o	o	o	o
	T455	T455A	o			o	o	o	o	o			T455	T455A	o		o	o	o	o	o
	Q457	Q457A	o			o	o	o	o	o			Q457	Q457A	o		o	o	o	o	o
	R459	R459A	+	--	c	o	o	-	o	o			R459	R459A	+	-- (c)	o	o	-	o	o
	G466	G466R	--			o	o	o	o	o			G466	G466R	--		o	o	o	o	o
	S468	S468A	o			o	o	o	o	o			S468	S468A	o		o	o	o	o	o
	D469	D469A	--			+	o	o	o	+			D469	D469A	--		+	o	o	o	+
	R471	R471A	+	-	a	o	o	-	o	o			R471	R471A	+	- (a)	o	o	-	o	o
	D472	D472A	o			o	o	o	o	o			D472	D472A	o		o	o	o	o	o
	R484	R484A		--	c	-	o	-	o	o			R484	R484A		-- (c)	-	o	-	o	o
V	R487	R487A		--	c	-	o	--	o	o		V	R487	R487A		-- (c)	-	o	--	o	o
		R487K	-			-	o	-	o	-				R487K	-		-	o	-	o	-
	T491	T491A	o			o	o	o	o	o			T491	T491A	o		o	o	o	o	o
	S492	S492A	o			o	o	o	o	+			S492	S492A	o		o	o	o	o	+
		S492T	o			o	o	o	o	o				S492T	o		o	o	o	o	o
	A493	A493R	--			+	o	-	o	o			A493	A493R	--		+	o	-	o	o
	D494	D494A	--			o	o	o	o	--			D494	D494A	--		o	o	o	o	--
		D494E	+			o	o	o	o	o				D494E	+		o	o	o	o	o
		D494N	--			o	o	-	o	o				D494N	--		o	o	-	o	o
		D494Q	--			o	o	o	o	o				D494Q	--		o	o	o	o	o
	N496	N496A	+			-	o	-	o	-			N496	N496A	+		-	o	-	o	-
	N497	N497A	-			o	o	o	o	o			N497	N497A	-		o	o	o	o	o
		N497H	+			--	o	-	-	o				N497H	+		--	o	-	-	o
		N497K	--				o	-	--	++				N497K	--			o	-	--	++
	S498	S498A	--			o	o	o	o	o			S498	S498A	--		o	o	o	o	o
	E499	E499A	-			o	o	o	o	o			E499	E499A	-		o	o	o	o	o
	W502	W502A	--	o	b	--	--	--	-	-			W502	W502A	--		--	--	--	-	-
														1: W503A		o (b)
		W502F	--			-	o	o	o	o				W502F	--		-	o	o	o	o
	T503	T503A	--	--	b	--	o	o	o	o			T503	T503A	--		--	o	o	o	o
														1: T504A		-- (b)
		T503S	-			-	o	o	o	o				T503S	-		-	o	o	o	o
	H509	H509A		--	c	o	o	-	o	o			H509	H509A		-- (c)	o	o	-	o	o
		H509F	--			o	-	--	o	--				H509F	--		o	-	--	o	--
		H509K	o			o	o	o	o	o				H509K	o		o	o	o	o	o
		H509N	o			o	-	--	o	o				H509N	o		o	-	--	o	o
		H509Q	o			o	o	--	o	o				H509Q	o		o	o	--	o	o
	G512	G512A	--			o	o	-	o	o			G512	G512A	--		o	o	-	o	o
		G512P	--			o	o	o	+	+				G512P	--		o	o	o	+	+
	R513	R513A		-	c	-	-	-	o	-			R513	R513A		- (c)	-	-	-	o	-
	D514	D514A	o			o	o	-	o	o			D514	D514A	o		o	o	-	o	o
VI	K527	K527A	o			o	o	--	o	o		VI	K527	K527A	o		o	o	--	o	o
	D528	D528A	--			-	-	-	o	o			D528	D528A	--		-	-	-	o	o
	D529	D529A	--			o	-	-	o	o			D529	D529A	--		o	-	-	o	o
		D529E	-			--	o	o	o	o				D529E	-		--	o	o	o	o
		D529I	--			o	o	o	o	o				D529I	--		o	o	o	o	o
		D529N	--			-	o	o	o	o				D529N	--		-	o	o	o	o
		D529V	--			-	o	-	o	o				D529V	--		-	o	-	o	o
	E530	E530A	--			-	-	-	-	o			E530	E530A	--		-	-	-	-	o
		E530D	o			o	o	o	o	o				E530D	o		o	o	o	o	o
		E530K	--			ND	o	--	o	o				E530K	--		ND	o	--	o	o
		E530Q	--			-	o	o	o	o				E530Q	--		-	o	o	o	o
	E531	E531A	-			-	-	-	-	o			E531	E531A	-		-	-	-	-	o
		E531K	--			-	-	-	o	o				E531K	--		-	-	-	o	o
	K532	K532A	+	--	c	o	o	--	o	-			K532	K532A	+	-- (c)	o	o	--	o	-
	F533	F533A	o			--	--	--	-	--			F533	F533A	o		--	--	--	-	--
VII	K544	K544A	o	o	c	o	o	o	o	o		VII	K544	K544A	o	o (c)	o	o	o	o	o
				+	b									5: S531A		+ (b)
	Q545?			-	b								Q545?	5: Q532A		- (b)
	E548	E548A	o	o	b	o	o	o	o	o			E548	E548A	o		o	o	o	o	o
														5: N535A		o (b)
		E548K	--			o	o	o	o	++				E548K	--		o	o	o	o	++
	T550	T550A	o	o	b	o	o	o	o	o			T550	T550A	o		o	o	o	o	o
														5: A540G		o (b)
		T550K	-			o	o	o	o	o				T550K	-		o	o	o	o	o
	V552?			-	b								V552?	5: Y542A		- (b)
	D553?			o	b								D553?	5: L543A		o (b)
	E555	E555A	-			o	o	o	o	o			E555	E555A	-		o	o	o	o	o
													K556	K556A	+		o	o	o	o	o
	K556	K556A	+	--	b	o	o	o	o	o				5: N546A		-- (b)
	K566	K566A		o	c	o	o	o	o	o			K566	K566A		o (c)	o	o	o	o	o
	E574	E574A	--			o	o	o	o	o			E574	E574A	--		o	o	o	o	o
	Q575	Q575A	o			o	o	o	o	o			Q575	Q575A	o		o	o	o	o	o
VIII	R585	R585A	--	--	c	-	o	--	o	o		VIII	R585	R585A	--	-- (c)	-	o	--	o	o
		R585K	o	-	c	o	o	-	o	o				R585K	o	- (c)	o	o	-	o	o
	G586	G586A	o			+	o	o	o	o			G586	G586A	o		+	o	o	o	o
		G586K	--			o	o	-	o	o				G586K	--		o	o	-	o	o
	N587	N587A	o	-	c	o	o	o	o	o			N587	N587A	o	- (c)	o	o	o	o	o
		N587K	--			o	o	-	o	o				N587K	--		o	o	-	o	o
	R588	R588A	--	--	c	-	o	--	o	o			R588	R588A	--	-- (c)	-	o	--	o	o
		R588K	o			o	o	o	o	o				R588K	o		o	o	o	o	o
	Q589	Q589A	o	--	a	o	o	o	o	o			Q589	Q589A	o	-- (a)	o	o	o	o	o
				-	b									1: T590A		- (b)
IX	N705	N705A	o			o	o	o	o	o		IX	N705	N705A	o		o	o	o	o	o
		N705K	-			o	o	o	o	o				N705K	-		o	o	o	o	o
	K706	K706A	--			o	o	o	o	o			K706	K706A	--		o	o	o	o	o
	V708	V708A	o	o	b	o	o	o	o	o			V708	V708A	o		o	o	o	o	o
														5: Q697A		o (b)
		V708K	o			o	o	o	o	o				V708K	o		o	o	o	o	o
	N709			--	b								N709	5: F698A		-- (b)
	V719			-	b								V719	5: E708A		- (b)
	S721			--	b								S721	5: R710A		-- (b)
	P723			o	b								P723	5: T712A		o (b)

## Sheet: Supp Table 2
	skin	lung	kidney	cervix	liver	bone				liver	kidney	cervix	retina	skin	lung
AAV1	74,91	86	74	95		90,77			AAV1		0.05			0.05
AAV2	86	88	83	80	62	98,90			AAV2	0.2	0.2	0.05	0.1	0.5
AAV3	63	97	84	98	74	63,88			AAV3					0.1
AAV4						67			AAV4
AAV5									AAV5
AAV6	80,95	98	76	84		72,81			AAV6					0.05
AAV7									not tested
AAV8									AAV8
AAV9									AAV9
									AAVDJ	1	1	0.33	0.5	14.29	0.1
	Values are the percentage of GFP positive cells ≥ 50% from Ellis et al., 2013 (Figure 2)									Values are the percentage of GFP positive cells ≥ 0.05% from Grimm et al., 2008 (Table 3)
	cell line									cell line
skin:	HUVEC (human umbilical cord vein endothelial cells)								liver:	Huh-7 (hepatocellular carcinoma)
	Keratinocyte (epidermis- outer layer of skin)								kidney:	HEK 293 (human embryonic kidney cells)
lung:	HBEC (human bronchial epithelial cells)								cervix:	HeLa (Henrietta Lacks malignant epithelial cells from cervix)
kidney:	HEK 293 (human embryonic kidney cells)								retina:	HER911 (Human Embryonic Retinoblasts)
cervix:	HeLa (Henrietta Lacks malignant epithelial cells from cervix)								skin:	MeWo (malignant melanoma cells)
liver:	HepG2 (hepatocellular carcinoma)								lung:	A549 (adenocarcinomic alveolar basal epithelial cells)
	HT-29 (colon adenocarcinoma cells)
bone:	Saos-2 (sarcoma osteogenic)
	U2OS (osteosarcoma)
													cell line	ref
													911	Fallaux F.J., Kranenburg O., Cramer S.J., Houweling A., van Ormondt H., Hoeben R.C., van der Eb A.J.
														Characterization of 911: a new helper cell line for the titration and propagation of early region 1-deleted adenoviral vectors.
														Hum. Gene Ther. 7:215-222(1996)
